# Supplementary material for: Machine-learning assisted high-throughput discovery of solid-state electrolytes for Li-ion batteries
Source: Royal Society of Chemistry journal article supplement (doi:10.1039/d4ta00721b), 2024-01-01
Supplement: d4ta00721b1.pdf [file d4ta00721b1.pdf]

# Supporting Information for Machine-Learning Assisted High-Throughput Discovery of Solid-State Electrolytes for Li-ion Batteries

Xingyu Guo,<sup>\*,†</sup> Zhenbin Wang,<sup>‡,¶</sup> Ji-Hui Yang,<sup>†</sup> and Xin-Gao Gong<sup>\*,†</sup>

<sup>†</sup>*Department of Physics, Key Laboratory of Computational Physical Sciences (Ministry of Education), Institute of Computational Physical Sciences, State Key Laboratory of Surface Physics, Fudan University, Shanghai 200433, China*

<sup>‡</sup>*Department of Materials Science and Engineering, City University of Hong Kong, Hong Kong 999077, China*

<sup>¶</sup>*School of Energy and Environment, Department of Materials Science and Engineering, City University of Hong Kong, Hong Kong 999077, China*

E-mail: xguo@fudan.edu.cn; xggong@fudan.edu.cn

# Li<sup>+</sup> conductivity of known lithium-ion conductors

Table S1: Li<sup>+</sup> conductivity of selected known lithium-ion conductors.

| Material                                                                                | Exp. (mS/cm)                        | Ref   |
|-----------------------------------------------------------------------------------------|-------------------------------------|-------|
| Li <sub>4</sub> P <sub>2</sub> S <sub>6</sub>                                           | 2.38 x 10 <sup>-4</sup>             | 1     |
| LiZnPS <sub>4</sub>                                                                     | ~ 10 <sup>-4</sup>                  | 2     |
| Li <sub>10</sub> GeP <sub>2</sub> S <sub>12</sub>                                       | 12                                  | 3     |
| Li <sub>10</sub> SiP <sub>2</sub> S <sub>12</sub>                                       | 2.3                                 | 4     |
| Li <sub>10</sub> SnP <sub>2</sub> S <sub>12</sub>                                       | 4                                   | 5     |
| Li <sub>7</sub> P <sub>3</sub> S <sub>11</sub>                                          | 1.5                                 | 6     |
| Li <sub>10</sub> Si <sub>1.5</sub> P <sub>1.5</sub> S <sub>11.5</sub> Cl <sub>0.5</sub> | 25                                  | 7     |
| Li <sub>6</sub> PS <sub>5</sub> Cl                                                      | 3.15                                | 8     |
| Li <sub>7</sub> La <sub>3</sub> Zr <sub>2</sub> O <sub>12</sub> (LLZO)                  | ~ 10 <sup>-1</sup>                  | 9     |
| Li <sub>2</sub> La <sub>2</sub> Ti <sub>3</sub> O <sub>10</sub> (LLTO)                  | ~ 10 <sup>-2</sup>                  | 10    |
| Li <sub>3</sub> OCl <sub>0.5</sub> Br <sub>0.5</sub>                                    | ~ 1                                 | 11    |
| Li <sub>3</sub> YCl <sub>6</sub>                                                        | 0.51                                | 12    |
| Li <sub>3</sub> YBr <sub>6</sub>                                                        | 1.70                                | 12    |
| LiFePO <sub>4</sub>                                                                     | 10 <sup>-8</sup> ~ 10 <sup>-7</sup> | 13,14 |
| NCM111                                                                                  | 10 <sup>-2</sup> ~ 10 <sup>-3</sup> | 15    |
| LiCoO <sub>2</sub>                                                                      | 10 <sup>-2</sup> ~ 1                | 16-18 |

# Benchmark of electronic band gaps

Table S2: Calculated band gaps of common solid-state electrolytes, obtained from density functional theory (DFT) calculations, using the Perdew–Burke–Ernzerhof (PBE) and Heyd–Scuseria–Ernzerhof (HSE) functionals, and machine-learning (ML) predictions using the HSE 4-fi-MEGNet model.

| material                                                                                | $E_g$ (eV) |         |        |
|-----------------------------------------------------------------------------------------|------------|---------|--------|
|                                                                                         | DFT-PBE    | DFT-HSE | ML-HSE |
| c-Na <sub>3</sub> PS <sub>4</sub>                                                       | 2.29       | 3.38    | 3.17   |
| LiZnPS <sub>4</sub>                                                                     | 2.73       | 3.86    | 3.69   |
| LiAl(PS <sub>3</sub> ) <sub>2</sub>                                                     | 2.75       | 3.74    | 3.58   |
| Li <sub>4</sub> P <sub>2</sub> S <sub>6</sub>                                           | 0          | -       | 3.27   |
| Li <sub>10</sub> GeP <sub>2</sub> S <sub>12</sub>                                       | 2.06       | -       | 3.14   |
| Li <sub>10</sub> SiP <sub>2</sub> S <sub>12</sub>                                       | 2.38       | -       | 3.54   |
| Li <sub>10</sub> SnP <sub>2</sub> S <sub>12</sub>                                       | 2.0        | -       | 3.16   |
| Li <sub>7</sub> P <sub>3</sub> S <sub>11</sub>                                          | 2.41       | -       | 3.44   |
| Li <sub>5</sub> PS <sub>4</sub> Cl <sub>2</sub>                                         | 2.78       | 3.57    | 3.57   |
| Li <sub>10</sub> Si <sub>1.5</sub> P <sub>1.5</sub> S <sub>11.5</sub> Cl <sub>0.5</sub> | 2.31       | -       | 3.56   |
| Li <sub>3</sub> PS <sub>4</sub>                                                         | 2.81       | -       | 3.44   |
| Li <sub>7</sub> La <sub>3</sub> Zr <sub>2</sub> O <sub>12</sub> (LLZO)                  | 4.33       | 4.12    | 5.43   |
| Li <sub>2</sub> La <sub>2</sub> Ti <sub>3</sub> O <sub>10</sub> (LLTO)                  | 2.84       | 3.34    | 3.33   |

## Statistics of screening process

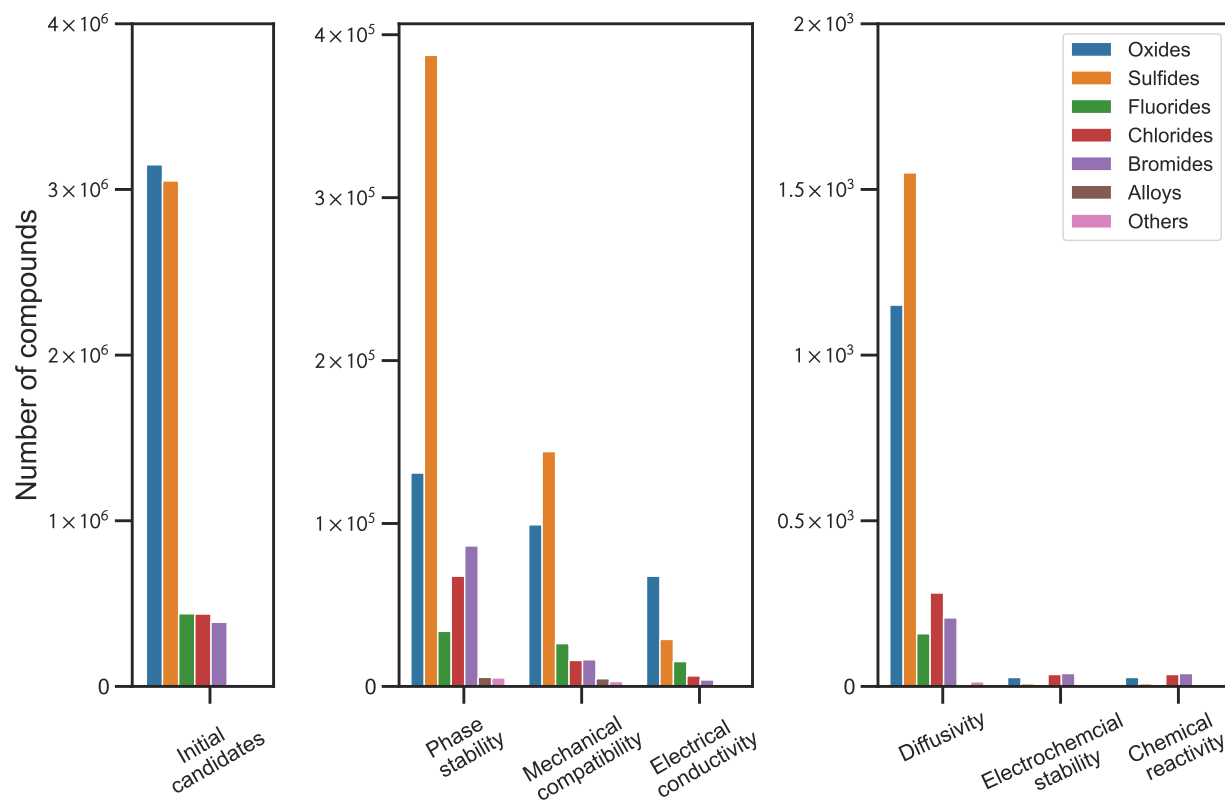

Figure S1: Histogram of numbers of compounds for each category that pass each filter in the high-throughput identification.

Table S3: Statistical analysis of lithium-based compounds from the Inorganic Crystal Structure Database(ICSD), Materials Project and Mattaverse database. This analysis quantifies the materials from the Materials Project and Mattaverse database that meet the phase stability screening criterion, defined as energy above the hull ( $E_{hull-m}$ ) being less than 30 meV/atom. The analysis was limited to ordered structures only.

|           | ICSD  | Materials Project | Mattaverse |
|-----------|-------|-------------------|------------|
| Oxides    | 1,497 | 3,258             | 13,097     |
| Sulfides  | 110   | 206               | 38,735     |
| Fluorides | 157   | 320               | 3,382      |
| Chlorides | 47    | 98                | 6,767      |
| Bromides  | 29    | 47                | 8,624      |
| Alloys    | 260   | 756               | 556        |
| Others    | 789   | 594               | 448        |

# Tree-based Classification Model on $\text{Li}^+$ conductivities

Leveraging the dataset (10,769 data point) produced in our high-throughput calculations, we developed a machine learning tree-based classification model to elucidate the structure-chemistry-conductivity relationship. According to our benchmark results, solid electrolytes with an  $\text{MSD}_{800K} > 5 \text{ \AA}^2$  demonstrate baseline  $\text{Li}^+$  conductivities. We thus classified the candidates into two groups : materials with  $\text{MSD}_{800K}$  below  $5 \text{ \AA}^2$  are designated as having no  $\text{Li}^+$  conduction (Probability of  $\text{Li}^+$  conduction = 0), while materials with  $\text{MSD}_{800K}$  exceeding  $5 \text{ \AA}^2$  are identified as displaying baseline  $\text{Li}^+$  conductivity (Probability of  $\text{Li}^+$  conduction = 1).

87 physically-informed features were created for each material to describe their properties of composition, crystal structure and crystal sites. For example, the channel size of  $\text{Li}^+$  is characterized by the maximum packing efficiency, the packing fraction and volume of the given material. Maximum packing efficiency is defined as the maximum spatial occupancy of an atom within its local environment in a crystal structure. This efficiency is quantified by  $\sum_N \frac{4}{3} \cdot \pi \cdot r_{max}^3$ , where  $V$  represents the volume of the structure,  $N$  is the number of sites in the structure, and  $r_{max}$  is the radius of the largest possible atom for each site. The value of  $r_{max}$  is determined by the distance from the center of the cell to the nearest Voronoi face.<sup>19</sup> The packing fraction evaluates the ratio of the volume occupied by atoms to the total crystal lattice volume, calculated as  $\sum_N \frac{4}{3} \cdot \pi \cdot r_{atomic}^3$ , with  $r_{atomic}$  denoting the atomic radius of each atom in the structure. The connectivity of the channel size for  $\text{Li}^+$  within a structure is derived from its volume and packing fraction. A higher packing fraction indicates less void space within the structure, potentially decreasing the connectivity of  $\text{Li}^+$  conduction channels. In contrast, a larger volume suggests more void space, implying enhanced connectivity for  $\text{Li}^+$  conduction channels.

For features exhibiting a high degree of correlation with one another—specifically, those with a Pearson correlation coefficient greater than 0.75—the feature yielding better perfor-

mance was selected to construct the model, as shown in Figure S2. The developed classification model demonstrates an accuracy score of 0.975 and a Jaccard score of 0.962, indicating its high accuracy in distinguishing  $\text{Li}^+$  baseline conductivities.

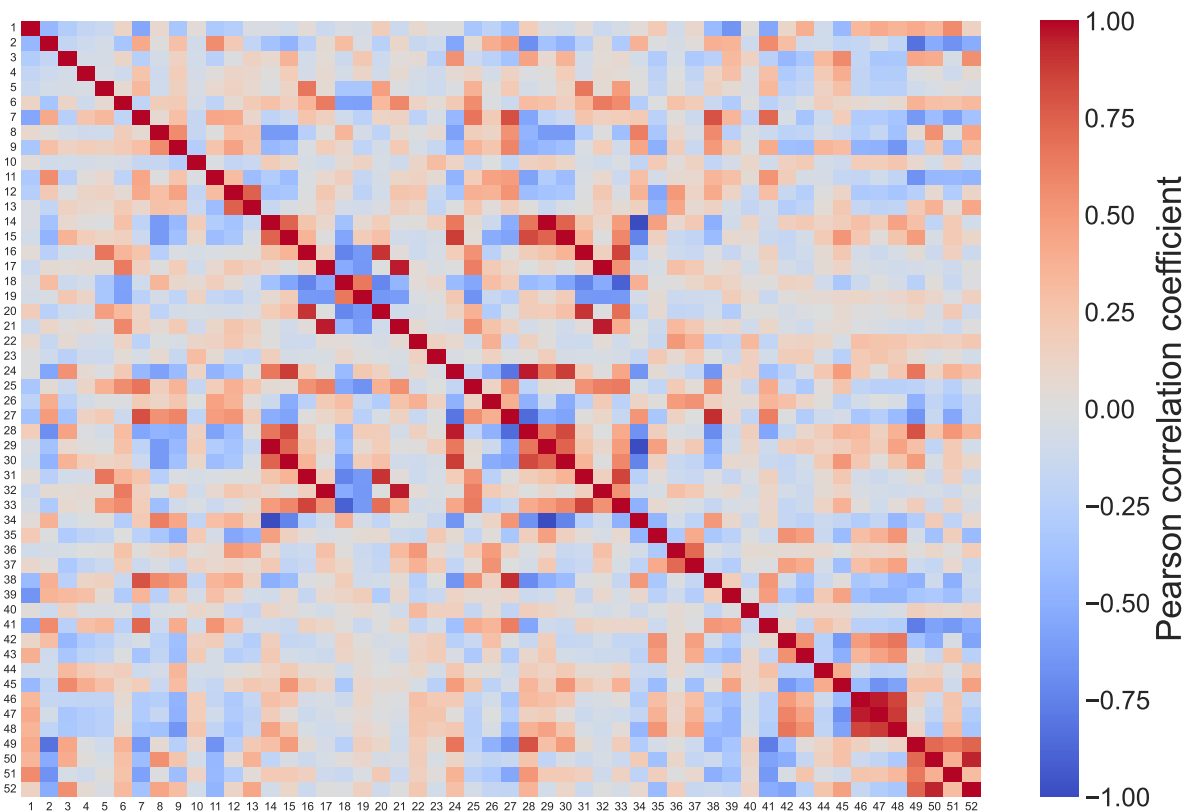

Figure S2: Calculated Pearson correlation coefficients of the pairs of features. The features are 1.Li-O bond fraction; 2.Li-S bond fraction; 3.Li-F bond fraction; 4.Li-Cl bond fraction; 5.Li-Br bond fraction; 6.Density; 7.Volume per atom; 8.Packing fraction; 9.Maximum packing efficiency; 10.Structural complexity per cell; 11.HOMO energy; 12.LUMO energy; 13.Atomic orbitals; 14.Average number of s valence electrons; 15.Average number of p valence electrons; 16.Average number of d valence electrons; 17.Average number of f valence electrons; 18.Fraction of s valence electrons; 19.Fraction of p valence electrons; 20.Fraction of d valence electrons; 21.Fraction of f valence electrons; 22.Transition metal fraction; 23.Stoichiometry 0-norm; 24.Band center; 25.MagpieData mean atomic weight; 26.Mean melting T; 27.Mean covalent radius; 28.Mean electronegativity; 29.Mean number of s valence electrons; 30.Mean number of p valence electrons; 31.Mean number of d valence electrons; 32.Mean number of f valence electrons; 33.Mean number of valence electrons; 34.Mean number of unfilled s orbitals; 35.Mean number of unfilled p orbitals;; 36.Mean number of unfilled d orbitals;; 37.Mean number of unfilled orbitals; 38.Ground state volume per atom; 39.Mean ground state bandgap; 40.Mean ground state magmom; 41.Average bond length Li-X; 42.Mean Li interstice area; 43.Mean Li interstice volume; 44.Coordination number; 45.Minimum oxidation state; 46.Maximum oxidation state; 47.Range of oxidation state; 48.Standard deviation of oxidation state; 49.Maximum ionic charge; 50.Average ionic charge; 51.Average anion electron affinity; 52.Mean electronegativity difference



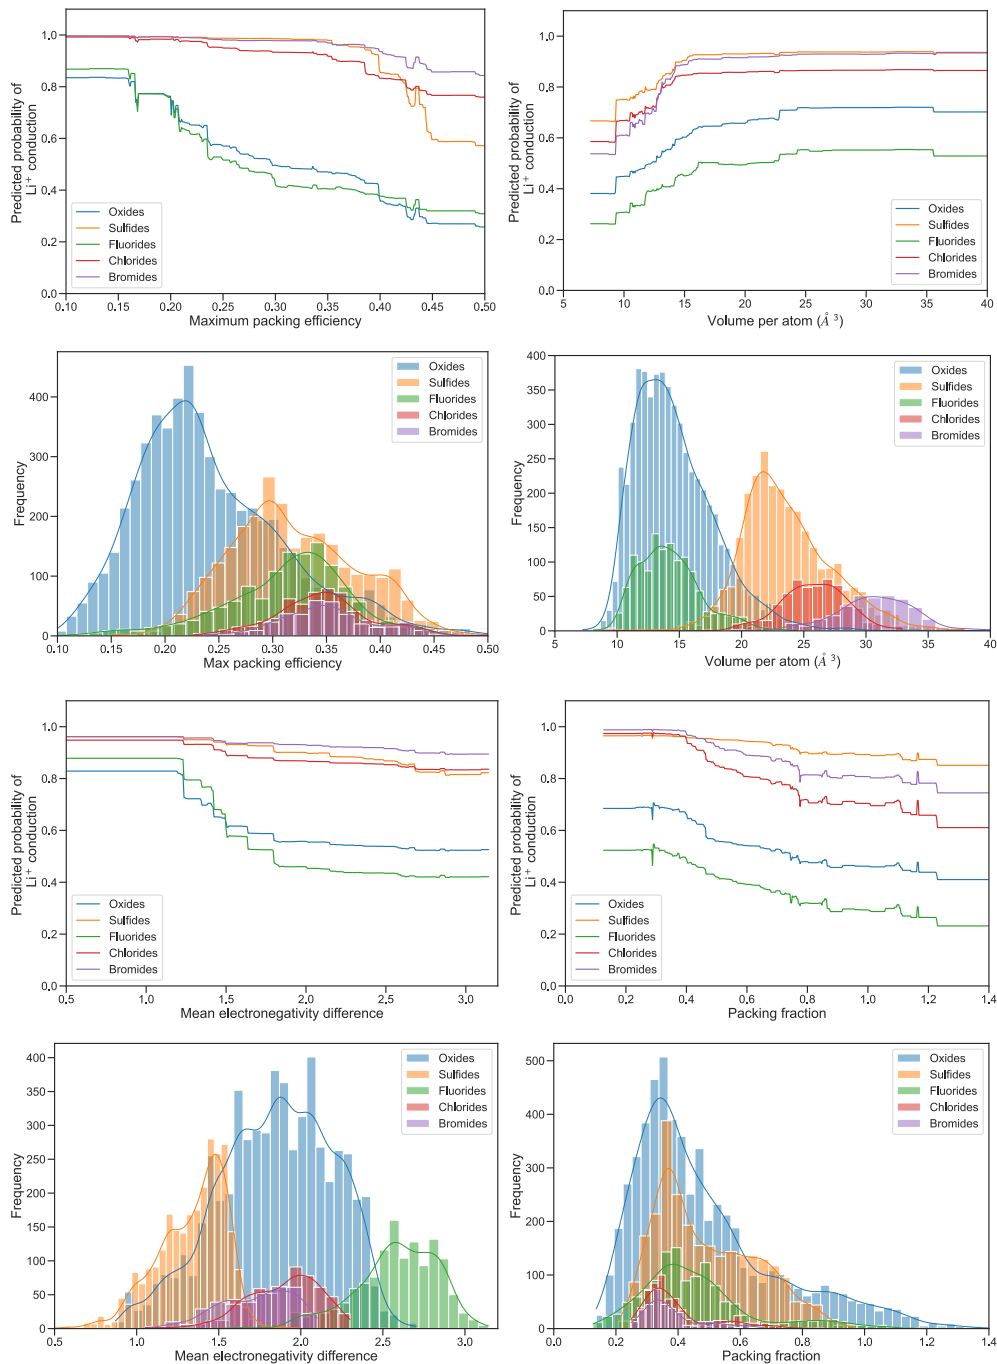

Figure S3: Partial dependence plots illustrating the influence of different features, (a) Maximum packing efficiency, (b) Packing fraction, (c) Volume per atom, and (d) Electronegativity difference, on the classification of  $\text{Li}^+$  diffusions. The accompanying histogram displays the frequency distribution of the datasets according to the feature values.

According to Figure S3, it is found that sulfides have in general larger volume than oxides and fluorides, suggesting that sulfides are more likely to form connected  $\text{Li}^+$  diffusion channels. Meanwhile, sulfides exhibit the smallest mean electronegativity difference with respect to Li, indicating minimized interactions of  $\text{Li}^+$  with neighboring anions while hopping. Similarly, chlorides and bromides also tend to form crystals with large volumes, enabling fast  $\text{Li}^+$  transportation. In contrast, oxides and fluorides tend to form crystals with relatively small volume, which may reduce the connection between individual  $\text{Li}^+$  diffusion channels. The large mean electronegativity difference in fluorides may result in sluggish  $\text{Li}^+$  diffusion. Therefore, the likelihood of finding fast  $\text{Li}^+$  conductors is higher in sulfides, chlorides, and bromides than it is in oxides and fluorides.

# Structure prototypes of the 130 identified promising candidate materials.

Table S4: Structure prototypes for the 130 promising candidate materials for solid electrolytes are represented in two ways: (i) the parent structure from which the candidate materials are derived through substitution; and (ii) the structure type of the parent structure as listed in the Inorganic Crystal Structure Database (ICSD).<sup>20,21</sup> The symbol '—' denotes the absence of a structure type in the ICSD.

| Promising candidates                                            |                                       |             | Parent Structures                                               |         | Structure type                                                     |
|-----------------------------------------------------------------|---------------------------------------|-------------|-----------------------------------------------------------------|---------|--------------------------------------------------------------------|
| Material                                                        | Space group                           | Material ID | Material                                                        | ICSD ID |                                                                    |
| LiCl                                                            | P6.3mc(186)                           | mp-1185319  | LiCl                                                            | -       | -                                                                  |
| LiBr                                                            |                                       | mv-25910967 | LiBr                                                            |         |                                                                    |
| Cs <sub>2</sub> LiScCl <sub>6</sub>                             | Fm-3m(225)                            | mp-1113004  | Cs <sub>2</sub> LiScCl <sub>6</sub>                             | -       | -                                                                  |
| SrLi <sub>2</sub> SiO <sub>4</sub>                              | Pnma(62)                              | mv-25910959 | Li <sub>2</sub> CdSiO <sub>4</sub>                              | 1113    | Li <sub>3</sub> PO <sub>4</sub>                                    |
| SrLi <sub>2</sub> GeO <sub>4</sub>                              |                                       | mv-25910967 |                                                                 |         |                                                                    |
| SrLiLuCl <sub>6</sub>                                           | P2 <sub>1</sub> /m(11)                | mv-23258662 | KHoBeF <sub>6</sub>                                             | 2143    | -                                                                  |
| LiLuCl <sub>4</sub>                                             | P2 <sub>1</sub> 12 <sub>1</sub> 1(19) | mv-31579856 | NaAlCl <sub>4</sub>                                             | 2307    | NaAlCl <sub>4</sub>                                                |
| SrLiScCl <sub>6</sub>                                           | P321(150)                             | mv-23989007 | LiMgAlF <sub>6</sub>                                            | 5007    | Na <sub>2</sub> SiF <sub>6</sub>                                   |
| SrLiScBr <sub>6</sub>                                           |                                       | mv-23989008 |                                                                 |         |                                                                    |
| SrLiLuBr <sub>6</sub>                                           |                                       | mv-23989089 |                                                                 |         |                                                                    |
| BaLiLuCl <sub>6</sub>                                           |                                       | mv-23989643 |                                                                 |         |                                                                    |
| SrLiLuCl <sub>6</sub>                                           |                                       | mv-23989088 |                                                                 |         |                                                                    |
| Li <sub>2</sub> BeF <sub>4</sub>                                | I-4(82)                               | mv-5203013  | Ag <sub>2</sub> HgI <sub>4</sub>                                | 6069    | CdAl <sub>2</sub> S <sub>4</sub> #CdGa <sub>2</sub> S <sub>4</sub> |
| Rb <sub>2</sub> LiYBr <sub>6</sub>                              | P-3m1(164)                            | mv-28307133 | Cs <sub>2</sub> LiGaF <sub>6</sub>                              | 9004    | -                                                                  |
| NaLi <sub>2</sub> LuBr <sub>6</sub>                             |                                       | mv-28300644 |                                                                 |         |                                                                    |
| K <sub>2</sub> LiScBr <sub>6</sub>                              |                                       | mv-28304448 |                                                                 |         |                                                                    |
| LiH <sub>3</sub> O <sub>2</sub>                                 | C2/m(12)                              | mp-27281    | LiH <sub>3</sub> O <sub>2</sub>                                 | 9138    | LiOHH <sub>2</sub> O                                               |
| LiLu <sub>2</sub> Cl <sub>7</sub>                               | C2/c(15)                              | mv-19344575 | CsSb <sub>2</sub> F <sub>7</sub>                                | 14119   | CsSb <sub>2</sub> F <sub>7</sub>                                   |
| LiAl <sub>2</sub> F <sub>7</sub>                                |                                       | mv-19344508 |                                                                 |         |                                                                    |
| Li <sub>4</sub> Ca <sub>2</sub> Si <sub>3</sub> O <sub>10</sub> | C2/c(15)                              | mv-13090933 | Na <sub>4</sub> Cd <sub>2</sub> Si <sub>3</sub> O <sub>10</sub> | 20185   | Na <sub>4</sub> Cd <sub>2</sub> Si <sub>3</sub> O <sub>10</sub>    |
| Rb <sub>3</sub> LiCaBr <sub>6</sub>                             | R-3m(166)                             | mv-16033288 | K <sub>3</sub> NaFeCl <sub>6</sub>                              | 23182   | K <sub>4</sub> CdCl <sub>6</sub>                                   |
| LiB(OH) <sub>4</sub>                                            | Pbca(61)                              | mp-23662    | LiB(OH) <sub>4</sub>                                            | 23837   | LiB(OH) <sub>4</sub>                                               |

Table S4: Continued

| Promising candidates                                              |                         |             | Parent Structures                                  |         | Structure type                                         |
|-------------------------------------------------------------------|-------------------------|-------------|----------------------------------------------------|---------|--------------------------------------------------------|
| Material                                                          | Space group             | Material ID | Material                                           | ICSD ID |                                                        |
| LiLuCl <sub>4</sub>                                               | P2 <sub>1</sub> /c(14)  | mv-31586317 | NaSbF <sub>4</sub>                                 | 24750   | LaTaO <sub>4</sub>                                     |
| CsLiCl <sub>2</sub>                                               | Cmcm(63)                | mv-31595624 | RbLiBr <sub>2</sub>                                | 30719   | RbLiBr <sub>2</sub>                                    |
| KLiCl <sub>2</sub>                                                |                         | mv-31595564 |                                                    |         |                                                        |
| KLi <sub>7</sub> (SiO <sub>4</sub> ) <sub>2</sub>                 | C2/m(12)                | mv-8803250  | RbLi <sub>7</sub> (SiO <sub>4</sub> ) <sub>2</sub> | 33864   | -                                                      |
| Rb <sub>7</sub> LiHf <sub>2</sub> O <sub>8</sub>                  |                         | mv-8805837  |                                                    |         |                                                        |
| NaLi <sub>7</sub> (GeO <sub>4</sub> ) <sub>2</sub>                |                         | mv-8803210  |                                                    |         |                                                        |
| KLi <sub>7</sub> (GeO <sub>4</sub> ) <sub>2</sub>                 |                         | mv-8803254  |                                                    |         |                                                        |
| LiLuCl <sub>4</sub>                                               | P2/c(13)                | mv-31568835 | LiAuF <sub>4</sub>                                 | 33953   | -                                                      |
| K <sub>2</sub> LiLuBr <sub>6</sub>                                | Pa-3(205)               | mv-28933317 | K <sub>2</sub> NaAlF <sub>6</sub>                  | 34201   | Ba <sub>2</sub> CrUO <sub>6</sub>                      |
| Li <sub>3</sub> ScCl <sub>6</sub>                                 | Pna2 <sub>1</sub> (33)  | mv-22830798 | Li <sub>3</sub> AlF <sub>6</sub>                   | 34672   | -                                                      |
| Li <sub>3</sub> LuCl <sub>6</sub>                                 |                         | mv-22830879 |                                                    |         |                                                        |
| K <sub>3</sub> LiSiS <sub>4</sub>                                 | P2 <sub>1</sub> /c(14)  | mv-15996940 | Rb <sub>3</sub> NaPbO <sub>4</sub>                 | 35416   | Rb <sub>3</sub> NaTiO <sub>4</sub>                     |
| SrLiScBr <sub>6</sub>                                             | P6 <sub>3</sub> 22(182) | mv-24115725 | LiSmAlF <sub>6</sub>                               | 36538   | LiSmAlF <sub>6</sub>                                   |
| SrLiLuBr <sub>6</sub>                                             |                         | mv-24115806 |                                                    |         |                                                        |
| BaLiScCl <sub>6</sub>                                             |                         | mv-24116279 |                                                    |         |                                                        |
| BaLiLuCl <sub>6</sub>                                             |                         | mv-24116360 |                                                    |         |                                                        |
| LiLu <sub>2</sub> Cl <sub>7</sub>                                 | P2 <sub>1</sub> /c(14)  | mv-20883250 | KDy <sub>2</sub> Cl <sub>7</sub>                   | 37007   | -                                                      |
| Li <sub>3</sub> Lu <sub>2</sub> Br <sub>9</sub>                   | P321(150)               | mv-15922265 | Cs <sub>3</sub> As <sub>2</sub> Cl <sub>9</sub>    | 45733   | Cs <sub>3</sub> Bi <sub>2</sub> Cl <sub>9</sub> (hP14) |
| K <sub>5</sub> Li(SiS <sub>3</sub> ) <sub>3</sub>                 | P2 <sub>1</sub> /m(11)  | mv-15353762 | Cs <sub>5</sub> Si <sub>3</sub> AgO <sub>9</sub>   | 51508   | -                                                      |
| RbLi <sub>2</sub> Cl <sub>3</sub>                                 | P2 <sub>1</sub> /m(11)  | mv-18416575 | CsCu <sub>2</sub> ICl <sub>2</sub>                 | 60960   | SbPO <sub>4</sub> #SbAsO <sub>4</sub>                  |
| CsLi <sub>2</sub> Cl <sub>3</sub>                                 |                         | mv-18417331 |                                                    |         |                                                        |
| Rb <sub>5</sub> LiBe <sub>8</sub> S <sub>11</sub>                 | P-1(2)                  | mv-15858566 | RbNa <sub>5</sub> Be <sub>8</sub> O <sub>11</sub>  | 65482   |                                                        |
| Li <sub>3</sub> LuCl <sub>6</sub>                                 | P-31m(162)              | mv-23180659 | NbHg <sub>3</sub> F <sub>6</sub>                   | 62027   | Hg <sub>3</sub> NbF <sub>6</sub>                       |
| Li <sub>3</sub> ScBr <sub>6</sub>                                 |                         | mv-23179688 |                                                    |         |                                                        |
| Li <sub>3</sub> LuBr <sub>6</sub>                                 |                         | mv-23180660 |                                                    |         |                                                        |
| LiSc <sub>6</sub> Tl <sub>2</sub> Br <sub>21</sub>                | C2(5)                   | mv-7289445  | Rb <sub>2</sub> NaAl <sub>6</sub> F <sub>21</sub>  | 68555   | -                                                      |
| Na <sub>2</sub> Li(Sc <sub>2</sub> Br <sub>7</sub> ) <sub>3</sub> |                         | mv-7289436  |                                                    |         |                                                        |
| NaLi <sub>2</sub> (Sc <sub>2</sub> Br <sub>7</sub> ) <sub>3</sub> |                         | mv-7289447  |                                                    |         |                                                        |
| Na <sub>2</sub> LiLu <sub>6</sub> Br <sub>21</sub>                |                         | mv-7301100  |                                                    |         |                                                        |

Table S4: Continued

| Promising candidates                                             |                                                    |             | Parent Structures                                               |         | Structure type                                                |
|------------------------------------------------------------------|----------------------------------------------------|-------------|-----------------------------------------------------------------|---------|---------------------------------------------------------------|
| Material                                                         | Space group                                        | Material ID | Material                                                        | ICSD ID |                                                               |
| NaLi <sub>2</sub> Lu <sub>6</sub> Br <sub>21</sub>               |                                                    | mv-7301111  |                                                                 |         |                                                               |
| KLi <sub>2</sub> (Sc <sub>2</sub> Br <sub>7</sub> ) <sub>3</sub> |                                                    | mv-7289471  |                                                                 |         |                                                               |
| Sr <sub>2</sub> LiLuCl <sub>8</sub>                              | P2 <sub>1</sub> /c(14)                             | mv-26367164 | NaSr <sub>2</sub> CrF <sub>8</sub>                              | 69032   | -                                                             |
| Sr <sub>2</sub> LiLuBr <sub>8</sub>                              |                                                    | mv-26367165 |                                                                 |         |                                                               |
| Ba <sub>2</sub> LiLuBr <sub>8</sub>                              |                                                    | mv-26367720 |                                                                 |         |                                                               |
| NaLi <sub>2</sub> PO <sub>4</sub>                                | Pnma(62)                                           | mp-558045   | NaLi <sub>2</sub> PO <sub>4</sub>                               | 69967   | Li <sub>3</sub> PO <sub>4</sub>                               |
| K <sub>2</sub> LiTaO <sub>4</sub>                                |                                                    | mv-26169630 |                                                                 |         |                                                               |
| NaLiHfF <sub>6</sub>                                             | Pnma(62)                                           | mv-23751362 | KNaSiF <sub>6</sub>                                             | 71334   | KNaSiF <sub>6</sub>                                           |
| LiScBr <sub>4</sub>                                              | P2 <sub>1</sub> /c(14)                             | mv-31583403 | NaMnF <sub>4</sub>                                              | 71455   | LiMnF <sub>4</sub>                                            |
| SrLiScCl <sub>6</sub>                                            | P2 <sub>1</sub> 2 <sub>1</sub> 2 <sub>1</sub> (19) | mv-24237717 | NaSrFeF <sub>6</sub>                                            | 71577   | Nd <sub>2</sub> WO <sub>6</sub> (oP36)                        |
| SrLiScBr <sub>6</sub>                                            |                                                    | mv-24237718 |                                                                 |         |                                                               |
| BaLiLuCl <sub>6</sub>                                            |                                                    | mv-24238353 |                                                                 |         |                                                               |
| BaLiLuBr <sub>6</sub>                                            |                                                    | mv-24238354 |                                                                 |         |                                                               |
| Rb <sub>4</sub> LiNbO <sub>5</sub>                               | P-1(2)                                             | mv-955162   | KLi <sub>4</sub> NbO <sub>5</sub>                               | 73124   | -                                                             |
| Ba <sub>7</sub> Li <sub>2</sub> Lu <sub>6</sub> Cl <sub>34</sub> | C2/m(12)                                           | mv-16242402 | Na <sub>2</sub> Sr <sub>7</sub> Al <sub>6</sub> F <sub>34</sub> | 78488   | -                                                             |
| Sr <sub>7</sub> Li <sub>2</sub> Lu <sub>6</sub> Cl <sub>34</sub> |                                                    | mv-16242397 |                                                                 |         |                                                               |
| SrLiLuCl <sub>6</sub>                                            | Pnma(62)                                           | mv-24203184 | NaAlCdF <sub>6</sub>                                            | 80559   | -                                                             |
| BaLiLuCl <sub>6</sub>                                            |                                                    | mv-24203199 |                                                                 |         |                                                               |
| Na <sub>2</sub> Li(ScBr <sub>4</sub> ) <sub>3</sub>              | C2/c(15)                                           | mv-6302369  | Cs <sub>2</sub> KMn <sub>3</sub> F <sub>12</sub>                | 83873   | -                                                             |
| Na <sub>2</sub> LiLu <sub>3</sub> Br <sub>12</sub>               |                                                    | mv-6302396  |                                                                 |         |                                                               |
| K <sub>2</sub> Li(ScBr <sub>4</sub> ) <sub>3</sub>               |                                                    | mv-6305033  |                                                                 |         |                                                               |
| Cs <sub>4</sub> Li <sub>2</sub> Al <sub>4</sub> S <sub>9</sub>   | P-1(2)                                             | mv-16124360 | K <sub>2</sub> Dy <sub>4</sub> Cu <sub>4</sub> S <sub>9</sub>   | 97562   | K <sub>2</sub> Dy <sub>4</sub> Cu <sub>4</sub> S <sub>9</sub> |
| LiInO <sub>2</sub>                                               | P-1(2)                                             | mv-27283190 | AgCO <sub>2</sub>                                               | 109601  | Ag <sub>2</sub> C <sub>2</sub> O <sub>4</sub>                 |
| Li <sub>2</sub> HfCl <sub>6</sub>                                | C2/c(15)                                           | mv-28216780 | Li <sub>2</sub> ZrF <sub>6</sub>                                | 155020  | -                                                             |
| SrLiScCl <sub>6</sub>                                            | P4 <sub>2</sub> nm(102)                            | mv-24018901 | LiMnVF <sub>6</sub>                                             | 167073  | LiFe <sub>2</sub> F <sub>6</sub>                              |
| SrLiLuCl <sub>6</sub>                                            |                                                    | mv-24018982 |                                                                 |         |                                                               |
| SrLiScBr <sub>6</sub>                                            |                                                    | mv-24018902 |                                                                 |         |                                                               |
| SrLiLuBr <sub>6</sub>                                            |                                                    | mv-24018983 |                                                                 |         |                                                               |
| LiCaScBr <sub>6</sub>                                            |                                                    | mv-24017903 |                                                                 |         |                                                               |

Table S4: Continued

| Promising candidates                                             |                        |             | Parent Structures                                               |         | Structure type                                    |
|------------------------------------------------------------------|------------------------|-------------|-----------------------------------------------------------------|---------|---------------------------------------------------|
| Material                                                         | Space group            | Material ID | Material                                                        | ICSD ID |                                                   |
| BaLiLuCl <sub>6</sub>                                            |                        | mv-24019537 |                                                                 |         |                                                   |
| KLiSiO <sub>3</sub>                                              | Iba2(45)               | mv-27371981 | TlAgTeO <sub>3</sub>                                            | 169995  | -                                                 |
| SrLi(BO <sub>2</sub> ) <sub>3</sub>                              | P-1(2)                 | mv-17202210 | KZn(BO <sub>2</sub> ) <sub>3</sub>                              | 174357  | KZnB <sub>3</sub> O <sub>6</sub>                  |
| SrLi <sub>2</sub> GeO <sub>4</sub>                               | P2 <sub>1</sub> /c(14) | mv-25943051 | Li <sub>2</sub> FeSiO <sub>4</sub>                              | 186519  | -                                                 |
| Li <sub>2</sub> CaBr <sub>4</sub>                                | Ama2(40)               | mv-20014595 | Rb <sub>2</sub> Cd(IBr) <sub>2</sub>                            | 194236  | Sr <sub>2</sub> GeSe <sub>4</sub>                 |
| LiLu <sub>3</sub> F <sub>10</sub>                                | P222 <sub>1</sub> (17) | mv-8011123  | RbIn <sub>3</sub> F <sub>10</sub>                               | 200052  | -                                                 |
| Li <sub>2</sub> LuBr <sub>2</sub> Cl <sub>3</sub>                | P-1(2)                 | mv-5349815  | Rb <sub>2</sub> SbCl <sub>3</sub> F <sub>2</sub>                | 200497  | -                                                 |
| LiLuBr <sub>4</sub>                                              | P2 <sub>1</sub> /c(14) | mv-31587649 | NaSbF <sub>4</sub>                                              | 200573  | LiTaO <sub>4</sub>                                |
| LiLuCl <sub>4</sub>                                              | P2 <sub>1</sub> /c(14) | mv-31635209 | TlSbF <sub>4</sub>                                              | 201084  | -                                                 |
| Li <sub>2</sub> HfF <sub>6</sub>                                 | P2 <sub>1</sub> /c(14) | mv-22716062 | K <sub>2</sub> TeClF <sub>5</sub>                               | 201603  | Sn <sub>3</sub> BrF <sub>5</sub>                  |
| Li <sub>2</sub> HfClF <sub>5</sub>                               |                        | mv-22716067 |                                                                 |         |                                                   |
| KLi <sub>2</sub> ScBr <sub>6</sub>                               | C2/c(15)               | mv-28459714 | CsK <sub>2</sub> BiCl <sub>6</sub>                              | 201983  | Rb <sub>3</sub> YCl <sub>6</sub>                  |
| K <sub>2</sub> LiLuBr <sub>6</sub>                               |                        | mv-28471345 |                                                                 |         |                                                   |
| Rb <sub>5</sub> LiZr <sub>2</sub> S <sub>7</sub>                 | C2/c(15)               | mv-12207323 | Na <sub>5</sub> AgGe <sub>2</sub> S <sub>7</sub>                | 237455  | Na <sub>6</sub> Ge <sub>2</sub> Se <sub>7</sub>   |
| LiScBr <sub>4</sub>                                              | C2/c(15)               | mv-31284828 | AlTiF <sub>4</sub>                                              | 202455  | NH <sub>4</sub> AlF <sub>4</sub>                  |
| LiLuCl <sub>4</sub>                                              |                        | mv-31285788 |                                                                 |         |                                                   |
| Sr <sub>3</sub> Li <sub>2</sub> Lu <sub>2</sub> Cl <sub>14</sub> | I2 <sub>13</sub> (199) | mv-3242974  | Na <sub>2</sub> Ca <sub>3</sub> Al <sub>2</sub> F <sub>14</sub> | 202657  | -                                                 |
| Ba <sub>3</sub> Li <sub>2</sub> Lu <sub>2</sub> Cl <sub>14</sub> |                        | mv-3243154  |                                                                 |         |                                                   |
| K <sub>3</sub> Li <sub>2</sub> F <sub>5</sub>                    | Fmm2(42)               | mv-9126917  | Cs <sub>3</sub> Li <sub>2</sub> F <sub>5</sub>                  | 245964  | -                                                 |
| Rb <sub>2</sub> Li <sub>3</sub> Br <sub>5</sub>                  | Amm2(38)               | mv-8407962  | Cs <sub>2</sub> Li <sub>3</sub> F <sub>5</sub>                  | 245966  | -                                                 |
| Rb <sub>2</sub> Li <sub>3</sub> Cl <sub>5</sub>                  |                        | mv-8407950  |                                                                 |         |                                                   |
| Rb <sub>2</sub> Li <sub>3</sub> Br <sub>5</sub>                  | Imm2(44)               | mv-7977990  | Cs <sub>2</sub> Li <sub>3</sub> Cl <sub>5</sub>                 | 245973  | -                                                 |
| RbLi <sub>3</sub> Br <sub>4</sub>                                | Cmcm(63)               | mv-22499633 | CsLi <sub>3</sub> Cl <sub>4</sub>                               | 245975  | -                                                 |
| SrLiVO <sub>4</sub>                                              | Pnma(62)               | mv-30437085 | LiCoPO <sub>4</sub>                                             | 258957  | Olivine#Mg <sub>2</sub> SiO <sub>4</sub>          |
| Na <sub>2</sub> Li(ScBr <sub>4</sub> ) <sub>3</sub>              | P2 <sub>1</sub> /m(11) | mv-6704684  | Cs <sub>2</sub> KTi <sub>3</sub> F <sub>12</sub>                | 259399  | Cs <sub>2</sub> NaTi <sub>3</sub> F <sub>12</sub> |
| NaLi <sub>2</sub> Lu <sub>3</sub> Br <sub>12</sub>               |                        | mv-6703544  |                                                                 |         |                                                   |
| Na <sub>2</sub> LiLu <sub>3</sub> Br <sub>12</sub>               |                        | mv-6704765  |                                                                 |         |                                                   |
| K <sub>2</sub> Li(ScBr <sub>4</sub> ) <sub>3</sub>               |                        | mv-6707348  |                                                                 |         |                                                   |

Table S4: Continued

| Promising candidates                              |             |             | Parent Structures                                 |         | Structure type                         |
|---------------------------------------------------|-------------|-------------|---------------------------------------------------|---------|----------------------------------------|
| Material                                          | Space group | Material ID | Material                                          | ICSD ID |                                        |
| $\text{Cs}_2\text{LiPO}_4$                        | Fddd(70)    | mv-24746431 | $\text{Cs}_2\text{LiVS}_4$                        | 414186  | $\text{K}_2\text{CuNbSe}_4$            |
| $\text{LiLu}_2\text{Cl}_7$                        | P-1(2)      | mv-21560230 | $\text{TlBi}_2\text{Cl}_7$                        | 421318  | -                                      |
| $\text{RbLiCl}_2$                                 | C2/c(15)    | mv-31397981 | $\text{CsLiCl}_2$                                 | 423634  | -                                      |
| $\text{RbLiLuCl}_5$                               | P2.1/c(14)  | mv-22089781 | $\text{KLiTmF}_5$                                 | 428536  | $\text{LiKYF}_5$                       |
| $\text{Li}_3\text{Ca}(\text{BO}_2)_5$             | P-1(2)      | mv-1332650  | $\text{Na}_3\text{Sr}(\text{BO}_2)_5$             | 260005  | $\text{Na}_3\text{SrB}_5\text{O}_{10}$ |
| $\text{SrLiLuCl}_6$                               | P2.1/c(14)  | mv-8065139  | $\text{BaLiAlF}_6$                                | 260011  | $\text{LiBaCrF}_6$                     |
| $\text{SrLiScBr}_6$                               |             | mv-8065059  |                                                   |         |                                        |
| $\text{SrLiLuBr}_6$                               |             | mv-8065140  |                                                   |         |                                        |
| $\text{Rb}_3\text{Li}_4\text{Y}_2\text{Cl}_{13}$  | Pn-3(201)   | mv-15830245 | $\text{Rb}_3\text{Tm}_2\text{Cu}_4\text{Br}_{13}$ | 402503  | -                                      |
| $\text{Rb}_3\text{Li}_4\text{Lu}_2\text{Cl}_{13}$ |             | mv-15830965 |                                                   |         |                                        |
| $\text{Li}_7\text{Lu}_2\text{Cl}_{13}$            |             | mv-15824305 |                                                   |         |                                        |
| $\text{K}_3\text{Li}_4\text{Lu}_2\text{Cl}_{13}$  |             | mv-15828301 |                                                   |         |                                        |
| $\text{Cs}_3\text{Li}_4\text{Lu}_2\text{Cl}_{13}$ |             | mv-15834961 |                                                   |         |                                        |
| $\text{Na}_3\text{Li}_4\text{Sc}_2\text{Br}_{13}$ |             | mv-15824666 |                                                   |         |                                        |
| $\text{Na}_3\text{Li}_4\text{Lu}_2\text{Br}_{13}$ |             | mv-15825638 |                                                   |         |                                        |
| $\text{Li}_7\text{Lu}_2\text{Br}_{13}$            |             | mv-15824306 |                                                   |         |                                        |
| $\text{K}_3\text{Li}_4\text{Lu}_2\text{Br}_{13}$  |             | mv-15828302 |                                                   |         |                                        |
| $\text{Cs}_3\text{Li}_4\text{Al}_2\text{Cl}_{13}$ |             | mv-15833881 |                                                   |         |                                        |
| $\text{Na}_3\text{Li}_4\text{Sc}_2\text{Cl}_{13}$ |             | mv-15824665 |                                                   |         |                                        |
| $\text{Na}_3\text{Li}_4\text{Y}_2\text{Cl}_{13}$  |             | mv-15824917 |                                                   |         |                                        |
| $\text{Na}_3\text{Li}_4\text{Lu}_2\text{Cl}_{13}$ |             | mv-15825637 |                                                   |         |                                        |
| $\text{K}_3\text{Li}_4\text{Y}_2\text{Cl}_{13}$   |             | mv-15827581 |                                                   |         |                                        |

# Calculated properties of identified promising solid-state electrolytes ( $\sigma_{300K} < 10$ mS/cm)

Table S5: Calculated properties of identified promising solid-state electrolytes with  $\text{Li}^+$  conductivities lower than 10 mS/cm at 300 K. These properties include the composition of candidate material, phase stability ( $E_{hull-m}$ ), shear modulus (G), Pugh's ratio (G/K), HSE band gap ( $E_g$ ), electrochemical stability window,  $\text{Li}^+$  conductivity at 300 K and material's ID in the Matterverse database. The data is sorted by the predicted  $E_{hull-m}$  value. For materials do not exhibit diffusive behaviors in long-time MD simulations at 300 K, their  $\sigma_{300K}$ s were marked as "-".)

| Material                                         | $E_{hull-m}$<br>(meV/atom) | G (GPa) | G/K  | $E_g$ (eV) | Electrochemical<br>window (V) | $\sigma_{300K}$<br>(mS/cm) | Material ID |
|--------------------------------------------------|----------------------------|---------|------|------------|-------------------------------|----------------------------|-------------|
| $\text{K}_3\text{LiSiS}_4$                       | -187                       | 12.63   | 0.45 | 2.96       | 1.10~3.56                     | 0.01                       | mv-15996940 |
| $\text{Cs}_4\text{Li}_2\text{Al}_4\text{S}_9$    | -166                       | 9.54    | 0.38 | 3.05       | 0.79~3.64                     | 0.47                       | mv-16124360 |
| $\text{Rb}_4\text{LiNbO}_5$                      | -115                       | 16.44   | 0.51 | 2.82       | 1.09~3.67                     | 0.15                       | mv-955162   |
| $\text{Rb}_5\text{LiZr}_2\text{S}_7$             | -110                       | 8.83    | 0.40 | 2.53       | 0.75~3.25                     | 2.55                       | mv-12207323 |
| $\text{Rb}_5\text{LiBe}_8\text{S}_{11}$          | -95                        | 11.47   | 0.44 | 3.22       | 0.81~4.11                     | 0.02                       | mv-15858566 |
| $\text{K}_2\text{LiTaO}_4$                       | -87                        | 11.82   | 0.41 | 3.66       | 0.81~3.25                     | -                          | mv-26169630 |
| $\text{Rb}_7\text{LiHf}_2\text{O}_8$             | -70                        | 10.75   | 0.49 | 2.53       | 1.37~3.82                     | 0.33                       | mv-8805837  |
| $\text{K}_3\text{Li}_4\text{Lu}_2\text{Br}_{13}$ | -28                        | 8.86    | 0.51 | 3.69       | 0.62~3.38                     | 6.23                       | mv-15828302 |
| $\text{K}_2\text{LiLuBr}_6$                      | -16                        | 9.43    | 0.54 | 3.54       | 0.67~3.39                     | 0.01                       | mv-28933317 |
| $\text{K}_2\text{Li}(\text{ScBr}_4)_3$           | -14                        | 8.47    | 0.41 | 2.96       | 0.89~3.48                     | 0.04                       | mv-6305033  |
| $\text{LiSc}_6\text{Tl}_2\text{Br}_{21}$         | -13                        | 8.46    | 0.38 | 2.95       | 1.19~3.32                     | -                          | mv-7289445  |
| $\text{K}_2\text{LiLuBr}_6$                      | -12                        | 8.70    | 0.48 | 2.41       | 0.68~3.26                     | 6.06                       | mv-28471345 |
| $\text{SrLiLuCl}_6$                              | -11                        | 11.23   | 0.41 | 4.76       | 0.70~4.36                     | -                          | mv-23989088 |
| $\text{LiLu}_2\text{Cl}_7$                       | -11                        | 8.93    | 0.54 | 4.65       | 0.72~4.37                     | 1.2                        | mv-19344575 |
| $\text{Li}_2\text{HfF}_6$                        | -9                         | 9.69    | 0.32 | 6.42       | 1.16~6.40                     | 0.61                       | mv-22716062 |
| $\text{K}_3\text{Li}_4\text{Lu}_2\text{Cl}_{13}$ | -8                         | 10.22   | 0.47 | 4.88       | 0.62~4.33                     | 0.19                       | mv-15828301 |
| $\text{K}_2\text{LiScBr}_6$                      | -7                         | 9.05    | 0.57 | 3.06       | 0.90~3.29                     | -                          | mv-28304448 |
| $\text{BaLiLuCl}_6$                              | -6                         | 9.33    | 0.57 | 4.80       | 0.72~4.31                     | -                          | mv-24116360 |
| $\text{SrLi}_2\text{GeO}_4$                      | -6                         | 37.72   | 0.60 | 3.54       | 1.09~3.41                     | 0.37                       | mv-25910967 |
| $\text{BaLiLuCl}_6$                              | -6                         | 9.82    | 0.41 | 4.83       | 0.72~4.31                     | 2.71                       | mv-24238353 |
| $\text{SrLiLuCl}_6$                              | -6                         | 10.81   | 0.40 | 4.75       | 0.72~4.31                     | -                          | mv-24018982 |



Table S5: Continued

| Material                                                         | $E_{hull-m}$<br>(meV/atom) | G (GPa) | G/K  | $E_g$ (eV) | Electrochemical<br>window (V) | $\sigma_{300K}$<br>(mS/cm) | Material ID |
|------------------------------------------------------------------|----------------------------|---------|------|------------|-------------------------------|----------------------------|-------------|
| SrLiLuBr <sub>6</sub>                                            | -5                         | 9.47    | 0.45 | 4.02       | 0.71~3.28                     | -                          | mv-23989089 |
| Rb <sub>3</sub> Li <sub>4</sub> Lu <sub>2</sub> Cl <sub>13</sub> | -4                         | 10.17   | 0.45 | 5.07       | 0.67~4.3                      | 2.99                       | mv-15830965 |
| SrLiLuBr <sub>6</sub>                                            | -4                         | 10.04   | 0.48 | 4.00       | 0.71~3.27                     | -                          | mv-24018983 |
| LiLuCl <sub>4</sub>                                              | -4                         | 8.72    | 0.38 | 4.58       | 0.73~4.29                     | -                          | mv-31285788 |
| SrLiLuBr <sub>6</sub>                                            | -4                         | 9.86    | 0.45 | 3.98       | 0.71~3.26                     | 2.89                       | mv-24115806 |
| LiLuCl <sub>4</sub>                                              | -3                         | 8.83    | 0.37 | 4.56       | 0.73~4.28                     | -                          | mv-31568835 |
| LiLuCl <sub>4</sub>                                              | -3                         | 11.00   | 0.45 | 4.86       | 0.73~4.28                     | -                          | mv-31586317 |
| Li <sub>3</sub> LuCl <sub>6</sub>                                | -3                         | 13.08   | 0.48 | 4.84       | 0.73~4.27                     | 3.41                       | mv-22830879 |
| BaLiLuBr <sub>6</sub>                                            | -2                         | 8.67    | 0.41 | 3.90       | 0.72~3.24                     | -                          | mv-24238354 |
| Cs <sub>3</sub> Li <sub>4</sub> Lu <sub>2</sub> Cl <sub>13</sub> | -1                         | 9.47    | 0.46 | 5.07       | 0.64~4.27                     | 5.66                       | mv-15834961 |
| Ba <sub>2</sub> LiLuBr <sub>8</sub>                              | 0                          | 9.02    | 0.39 | 3.96       | 0.72~3.23                     | 1.82                       | mv-26367720 |
| KLi <sub>2</sub> (Sc <sub>2</sub> Br <sub>7</sub> ) <sub>3</sub> | 0                          | 8.50    | 0.41 | 3.01       | 0.92~3.23                     | 0.27                       | mv-7289471  |
| SrLi <sub>2</sub> GeO <sub>4</sub>                               | 1                          | 36.95   | 0.58 | 3.60       | 1.14~3.36                     | -                          | mv-25943051 |
| BaLiLuCl <sub>6</sub>                                            | 1                          | 9.05    | 0.44 | 4.80       | 0.74~4.26                     | -                          | mv-23989643 |
| Na <sub>3</sub> Li <sub>4</sub> Lu <sub>2</sub> Br <sub>13</sub> | 2                          | 11.27   | 0.60 | 3.78       | 0.72~3.23                     | 4.37                       | mv-15825638 |
| LiScBr <sub>4</sub>                                              | 2                          | 8.51    | 0.42 | 3.06       | 0.92~3.23                     | -                          | mv-31284828 |
| LiCaScBr <sub>6</sub>                                            | 3                          | 10.64   | 0.46 | 3.18       | 0.92~3.23                     | -                          | mv-24017903 |
| LiLu <sub>2</sub> Cl <sub>7</sub>                                | 5                          | 11.19   | 0.44 | 4.03       | 0.74~4.26                     | -                          | mv-20883250 |
| Li <sub>2</sub> LuBr <sub>2</sub> Cl <sub>3</sub>                | 5                          | 9.78    | 0.43 | 4.23       | 0.74~3.24                     | -                          | mv-5349815  |
| Li <sub>3</sub> LuBr <sub>6</sub>                                | 5                          | 11.47   | 0.52 | 3.86       | 0.72~3.23                     | -                          | mv-23180660 |
| SrLiScBr <sub>6</sub>                                            | 6                          | 9.00    | 0.38 | 3.20       | 0.92~3.23                     | -                          | mv-23989008 |
| LiH <sub>3</sub> O <sub>2</sub>                                  | 7                          | 16.36   | 0.57 | 4.46       | 1.39~3.46                     | -                          | mp-27281    |
| SrLiScBr <sub>6</sub>                                            | 8                          | 8.84    | 0.35 | 3.16       | 0.92~3.23                     | 0.2                        | mv-24115725 |
| Cs <sub>2</sub> LiScCl <sub>6</sub>                              | 8                          | 10.97   | 0.54 | 3.71       | 0.66~4.3                      | -                          | mp-1113004  |
| NaLi <sub>2</sub> PO <sub>4</sub>                                | 9                          | 32.54   | 0.52 | 4.98       | 0.71~4.01                     | 0.02                       | mp-558045   |
| SrLiScBr <sub>6</sub>                                            | 9                          | 10.23   | 0.44 | 3.21       | 0.92~3.23                     | 0.14                       | mv-24018902 |
| LiBr                                                             | 9                          | 8.50    | 0.47 | 4.33       | 0.01~3.23                     | 0.02                       | mp-976280   |
| Rb <sub>2</sub> LiYBr <sub>6</sub>                               | 9                          | 8.42    | 0.56 | 3.76       | 0.55~3.34                     | 0.65                       | mv-28307133 |
| BaLiLuCl <sub>6</sub>                                            | 9                          | 9.06    | 0.40 | 4.79       | 0.74~4.26                     | 0.15                       | mv-24019537 |

Table S5: Continued

| Material                                                          | $E_{hull-m}$<br>(meV/atom) | G (GPa) | G/K  | $E_g$ (eV) | Electrochemical<br>window (V) | $\sigma_{300K}$<br>(mS/cm) | Material ID |
|-------------------------------------------------------------------|----------------------------|---------|------|------------|-------------------------------|----------------------------|-------------|
| Na <sub>2</sub> LiLu <sub>6</sub> Br <sub>21</sub>                | 9                          | 9.68    | 0.58 | 3.68       | 0.72~3.23                     | -                          | mv-7301100  |
| Rb <sub>3</sub> Li <sub>4</sub> Y <sub>2</sub> Cl <sub>13</sub>   | 10                         | 9.67    | 0.43 | 4.69       | 0.59~4.26                     | 1.12                       | mv-15830245 |
| SrLiScBr <sub>6</sub>                                             | 11                         | 10.65   | 0.43 | 3.13       | 0.92~3.23                     | -                          | mv-24237718 |
| Na <sub>2</sub> Li(Sc <sub>2</sub> Br <sub>7</sub> ) <sub>3</sub> | 11                         | 10.00   | 0.51 | 3.11       | 0.92~3.23                     | -                          | mv-7289436  |
| Li <sub>3</sub> LuCl <sub>6</sub>                                 | 12                         | 13.68   | 0.48 | 4.97       | 0.74~4.26                     | -                          | mv-23180659 |
| SrLiLuCl <sub>6</sub>                                             | 12                         | 8.92    | 0.36 | 4.71       | 0.74~4.26                     | -                          | mv-23258662 |
| SrLiLuCl <sub>6</sub>                                             | 14                         | 10.72   | 0.48 | 4.66       | 0.74~4.26                     | -                          | mv-8065139  |
| KLi <sub>7</sub> (GeO <sub>4</sub> ) <sub>2</sub>                 | 14                         | 39.28   | 0.68 | 3.93       | 1.02~3.35                     | 6.5                        | mv-8803254  |
| Sr <sub>2</sub> LiLuCl <sub>8</sub>                               | 14                         | 12.55   | 0.47 | 4.75       | 0.74~4.26                     | -                          | mv-26367164 |
| LiB(HO) <sub>4</sub>                                              | 14                         | 18.12   | 0.53 | 5.47       | 1.44~3.58                     | -                          | mp-23662    |
| NaLi <sub>2</sub> (Sc <sub>2</sub> Br <sub>7</sub> ) <sub>3</sub> | 14                         | 9.54    | 0.49 | 3.04       | 0.92~3.23                     | -                          | mv-7289447  |
| CsLi <sub>2</sub> Cl <sub>3</sub>                                 | 16                         | 9.40    | 0.59 | 5.22       | 0.01~4.26                     | -                          | mv-18417331 |
| K <sub>3</sub> Li <sub>2</sub> F <sub>5</sub>                     | 16                         | 22.91   | 0.56 | 5.56       | 0.47~5.83                     | 5.1                        | mv-9126917  |
| SrLiScCl <sub>6</sub>                                             | 17                         | 11.54   | 0.47 | 3.65       | 0.92~4.26                     | -                          | mv-23989007 |
| Sr <sub>2</sub> LiLuBr <sub>8</sub>                               | 18                         | 11.22   | 0.49 | 3.85       | 0.72~3.23                     | -                          | mv-26367165 |
| LiCl                                                              | 18                         | 11.91   | 0.45 | 5.80       | 0.01~4.26                     | -                          | mp-1185319  |
| SrLiLuBr <sub>6</sub>                                             | 18                         | 9.98    | 0.49 | 3.80       | 0.72~3.23                     | -                          | mv-8065140  |
| Na <sub>2</sub> LiLu <sub>3</sub> Br <sub>12</sub>                | 19                         | 9.85    | 0.58 | 3.80       | 0.72~3.23                     | -                          | mv-6704765  |
| LiLuCl <sub>4</sub>                                               | 19                         | 9.33    | 0.53 | 4.49       | 0.74~4.26                     | -                          | mv-31579856 |
| NaLi <sub>2</sub> Lu <sub>3</sub> Br <sub>12</sub>                | 19                         | 9.44    | 0.55 | 3.83       | 0.72~3.23                     | -                          | mv-6703544  |
| SrLiScCl <sub>6</sub>                                             | 19                         | 11.62   | 0.49 | 3.69       | 0.92~4.26                     | 3.76                       | mv-24237717 |
| Li <sub>3</sub> ScBr <sub>6</sub>                                 | 19                         | 12.01   | 0.54 | 3.15       | 0.92~3.23                     | -                          | mv-23179688 |
| Na <sub>2</sub> LiLu <sub>3</sub> Br <sub>12</sub>                | 20                         | 9.54    | 0.57 | 3.77       | 0.72~3.23                     | -                          | mv-6302396  |
| Li <sub>3</sub> ScCl <sub>6</sub>                                 | 20                         | 13.36   | 0.58 | 3.82       | 0.92~4.26                     | -                          | mv-22830798 |
| Cs <sub>3</sub> Li <sub>4</sub> Al <sub>2</sub> Cl <sub>13</sub>  | 20                         | 11.98   | 0.52 | 4.19       | 1.36~4.26                     | 4.05                       | mv-15833881 |
| SrLi <sub>2</sub> SiO <sub>4</sub>                                | 21                         | 43.93   | 0.64 | 4.36       | 0.26~3.48                     | -                          | mv-25910959 |
| NaLi <sub>7</sub> (GeO <sub>4</sub> ) <sub>2</sub>                | 21                         | 38.09   | 0.64 | 3.85       | 1.02~3.34                     | 9.45                       | mv-8803210  |
| SrLiVO <sub>4</sub>                                               | 22                         | 28.34   | 0.47 | 3.61       | 1.42~3.73                     | 0.01                       | mv-30437085 |
| Na <sub>3</sub> Li <sub>4</sub> Lu <sub>2</sub> Cl <sub>13</sub>  | 22                         | 11.69   | 0.45 | 4.80       | 0.62~3.81                     | 3.71                       | mv-15825637 |

Table S5: Continued

| Material                                                         | $E_{hull-m}$<br>(meV/atom) | G (GPa) | G/K  | $E_g$ (eV) | Electrochemical<br>window (V) | $\sigma_{300K}$<br>(mS/cm) | Material ID |
|------------------------------------------------------------------|----------------------------|---------|------|------------|-------------------------------|----------------------------|-------------|
| LiInO <sub>2</sub>                                               | 22                         | 54.27   | 0.57 | 1.80       | 1.40~3.24                     | -                          | mv-27283190 |
| Na <sub>2</sub> Li(ScBr <sub>4</sub> ) <sub>3</sub>              | 23                         | 10.21   | 0.56 | 3.14       | 0.92~3.23                     | -                          | mv-6302369  |
| Li <sub>2</sub> HfCl <sub>6</sub>                                | 23                         | 10.86   | 0.60 | 4.48       | 1.37~4.26                     | 4.53                       | mv-28216780 |
| RbLiLuCl <sub>5</sub>                                            | 23                         | 13.15   | 0.47 | 4.46       | 0.74~4.26                     | -                          | mv-22089781 |
| NaLiHfF <sub>6</sub>                                             | 23                         | 12.77   | 0.45 | 6.77       | 1.18~6.37                     | -                          | mv-23751362 |
| Na <sub>3</sub> Li <sub>4</sub> Sc <sub>2</sub> Cl <sub>13</sub> | 24                         | 11.58   | 0.49 | 3.92       | 0.90~3.81                     | 0.29                       | mv-15824665 |
| LiLu <sub>2</sub> Cl <sub>7</sub>                                | 24                         | 10.64   | 0.40 | 3.99       | 0.74~4.26                     | -                          | mv-21560230 |
| Na <sub>3</sub> Li <sub>4</sub> Y <sub>2</sub> Cl <sub>13</sub>  | 24                         | 11.09   | 0.43 | 4.62       | 0.66~3.81                     | 5.59                       | mv-15824917 |
| KLi <sub>7</sub> (SiO <sub>4</sub> ) <sub>2</sub>                | 25                         | 41.62   | 0.67 | 4.60       | 0.54~3.38                     | 2.18                       | mv-8803250  |
| SrLiScCl <sub>6</sub>                                            | 25                         | 11.07   | 0.46 | 3.66       | 0.92~4.26                     | 0.15                       | mv-24018901 |
| SrLi(BO <sub>2</sub> ) <sub>3</sub>                              | 26                         | 23.04   | 0.44 | 4.36       | 1.25~3.68                     | 0.2                        | mv-17202210 |
| BaLiLuCl <sub>6</sub>                                            | 26                         | 9.57    | 0.41 | 4.81       | 0.74~4.26                     | -                          | mv-24203199 |
| BaLiScCl <sub>6</sub>                                            | 26                         | 9.99    | 0.67 | 3.70       | 0.92~4.26                     | 0.72                       | mv-24116279 |
| Na <sub>3</sub> Li <sub>4</sub> Sc <sub>2</sub> Br <sub>13</sub> | 26                         | 11.12   | 0.59 | 3.23       | 0.92~3.23                     | 1.06                       | mv-15824666 |
| LiLu <sub>3</sub> F <sub>10</sub>                                | 26                         | 23.30   | 0.34 | 6.03       | 0.73~6.69                     | -                          | mv-8011123  |
| LiLuCl <sub>4</sub>                                              | 26                         | 9.59    | 0.47 | 4.68       | 0.74~4.26                     | -                          | mv-31635209 |
| LiAl <sub>2</sub> F <sub>7</sub>                                 | 27                         | 25.42   | 0.43 | 7.67       | 1.29~6.48                     | -                          | mv-19344508 |
| Li <sub>4</sub> Ca <sub>2</sub> Si <sub>3</sub> O <sub>10</sub>  | 27                         | 36.94   | 0.55 | 4.77       | 0.88~3.59                     | 1.04                       | mv-13090933 |
| KLiSiO <sub>3</sub>                                              | 27                         | 34.05   | 0.68 | 4.42       | 0.83~3.59                     | -                          | mv-27371981 |
| SrLiLuCl <sub>6</sub>                                            | 27                         | 10.53   | 0.44 | 4.67       | 0.74~4.26                     | -                          | mv-24203184 |
| RbLi <sub>2</sub> Cl <sub>3</sub>                                | 29                         | 10.95   | 0.64 | 5.07       | 0.01~4.26                     | -                          | mv-18416575 |
| Li <sub>3</sub> Ca(BO <sub>2</sub> ) <sub>5</sub>                | 29                         | 30.33   | 0.5  | 5.20       | 1.26~3.68                     | -                          | mv-1332650  |
| Li <sub>2</sub> BeF <sub>4</sub>                                 | 30                         | 16.63   | 0.41 | 8.08       | 0.89~6.49                     | -                          | mv-5203013  |

## References

- (1) Hood, Z. D.; Kates, C.; Kirkham, M.; Adhikari, S.; Liang, C.; Holzwarth, N. A. Structural and electrolyte properties of Li<sub>4</sub>P<sub>2</sub>S<sub>6</sub>. *Solid State Ionics* **2016**, *284*, 61–70.
- (2) Suzuki, N.; Richards, W. D.; Wang, Y.; Miara, L. J.; Kim, J. C.; Jung, I.-S.; Tsujimura, T.; Ceder, G. Synthesis and Electrochemical Properties of I4-Type Li<sub>1+2x</sub>Zn<sub>1-x</sub>PS<sub>4</sub> Solid Electrolyte. *Chemistry of Materials* **2018**, *30*, 2236–2244.
- (3) Kamaya, N.; Homma, K.; Yamakawa, Y.; Hirayama, M.; Kanno, R.; Yonemura, M.; Kamiyama, T.; Kato, Y.; Hama, S.; Kawamoto, K., et al. A lithium superionic conductor. *Nature materials* **2011**, *10*, 682–686.
- (4) Whiteley, J. M.; Woo, J. H.; Hu, E.; Nam, K.-W.; Lee, S.-H. Empowering the lithium metal battery through a silicon-based superionic conductor. *Journal of the Electrochemical Society* **2014**, *161*, A1812.
- (5) Bron, P.; Johansson, S.; Zick, K.; Schmedt auf der Günne, J.; Dehnen, S.; Roling, B. Li<sub>10</sub>SnP<sub>2</sub>S<sub>12</sub>: an affordable lithium superionic conductor. *Journal of the American Chemical Society* **2013**, *135*, 15694–15697.
- (6) Yao, X.; Liu, D.; Wang, C.; Long, P.; Peng, G.; Hu, Y.-S.; Li, H.; Chen, L.; Xu, X. High-energy all-solid-state lithium batteries with ultralong cycle life. *Nano letters* **2016**, *16*, 7148–7154.
- (7) Kato, Y.; Hori, S.; Saito, T.; Suzuki, K.; Hirayama, M.; Mitsui, A.; Yonemura, M.; Iba, H.; Kanno, R. High-power all-solid-state batteries using sulfide superionic conductors. *Nature Energy* **2016**, *1*, 1–7.
- (8) Wang, S.; Zhang, Y.; Zhang, X.; Liu, T.; Lin, Y.-H.; Shen, Y.; Li, L.; Nan, C.-W. High-conductivity argyrodite Li<sub>6</sub>PS<sub>5</sub>Cl solid electrolytes prepared via optimized sintering

- processes for all-solid-state lithium–sulfur batteries. *ACS applied materials & interfaces* **2018**, *10*, 42279–42285.
- (9) Murugan, R.; Thangadurai, V.; Weppner, W. Fast lithium ion conduction in garnet-type  $\text{Li}_7\text{La}_3\text{Zr}_2\text{O}_{12}$ . *Angewandte Chemie International Edition* **2007**, *46*, 7778–7781.
- (10) Inaguma, Y.; Liqun, C.; Itoh, M.; Nakamura, T.; Uchida, T.; Ikuta, H.; Wakihara, M. High ionic conductivity in lithium lanthanum titanate. *Solid State Communications* **1993**, *86*, 689–693.
- (11) Zhao, Y.; Daemen, L. L. Superionic conductivity in lithium-rich anti-perovskites. *Journal of the American Chemical Society* **2012**, *134*, 15042–15047.
- (12) Asano, T.; Sakai, A.; Ouchi, S.; Sakaida, M.; Miyazaki, A.; Hasegawa, S. Solid halide electrolytes with high lithium-ion conductivity for application in 4 V class bulk-type all-solid-state batteries. *Advanced Materials* **2018**, *30*, 1803075.
- (13) Prosini, P. P.; Lisi, M.; Zane, D.; Pasquali, M. Determination of the chemical diffusion coefficient of lithium in  $\text{LiFePO}_4$ . *Solid state ionics* **2002**, *148*, 45–51.
- (14) Xu, Y.-N.; Chung, S.-Y.; Bloking, J. T.; Chiang, Y.-M.; Ching, W. Electronic structure and electrical conductivity of undoped  $\text{LiFePO}_4$ . *Electrochemical and Solid-State Letters* **2004**, *7*, A131.
- (15) Li, J.; Liu, Z.; Wang, Y.; Wang, R. Investigation of facial  $\text{B}_2\text{O}_3$  surface modification effect on the cycling stability and high-rate capacity of  $\text{LiNi}_{1/3}\text{Co}_{1/3}\text{Mn}_{1/3}\text{O}_2$  cathode. *Journal of Alloys and Compounds* **2020**, *834*, 155150.
- (16) Dokko, K.; Mohamedi, M.; Fujita, Y.; Itoh, T.; Nishizawa, M.; Umeda, M.; Uchida, I. Kinetic characterization of single particles of  $\text{LiCoO}_2$  by AC impedance and potential step methods. *Journal of the Electrochemical Society* **2001**, *148*, A422.

- (17) Barker, J.; Pynenburg, R.; Koksang, R.; Saidi, M. An electrochemical investigation into the lithium insertion properties of  $\text{Li}_x\text{CoO}_2$ . *Electrochimica acta* **1996**, *41*, 2481–2488.
- (18) Levasseur, S.; Ménétrier, M.; Delmas, C. On the dual effect of Mg doping in  $\text{LiCoO}_2$  and  $\text{Li}_{1+\delta}\text{CoO}_2$ : structural, electronic properties, and  $^7\text{Li}$  MAS NMR studies. *Chemistry of materials* **2002**, *14*, 3584–3590.
- (19) Ward, L.; Liu, R.; Krishna, A.; Hegde, V. I.; Agrawal, A.; Choudhary, A.; Wolverton, C. Including crystal structure attributes in machine learning models of formation energies via Voronoi tessellations. *Physical Review B* **2017**, *96*, 024104.
- (20) Allmann, R.; Hinek, R. The introduction of structure types into the Inorganic Crystal Structure Database ICSD. *Acta Crystallographica Section A: Foundations of Crystallography* **2007**, *63*, 412–417.
- (21) Zagorac, D.; Müller, H.; Ruehl, S.; Zagorac, J.; Rehme, S. Recent developments in the Inorganic Crystal Structure Database: theoretical crystal structure data and related features. *Journal of applied crystallography* **2019**, *52*, 918–925.
